# Supplementary material
Source: ML conference proceedings conference paper supplement (https://openaccess.thecvf.com/content/CVPR2026/html/Min_Multimodal_Semantic_Bias_CVPR_2026_paper.html)
Supplement: Supplementary file 1 [file Min_Multimodal_Semantic_Bias_CVPR_2026_supplemental.pdf]

# Multimodal Semantic Bias Mitigation for Diverse Text-To-3D Generation

## Supplementary Material

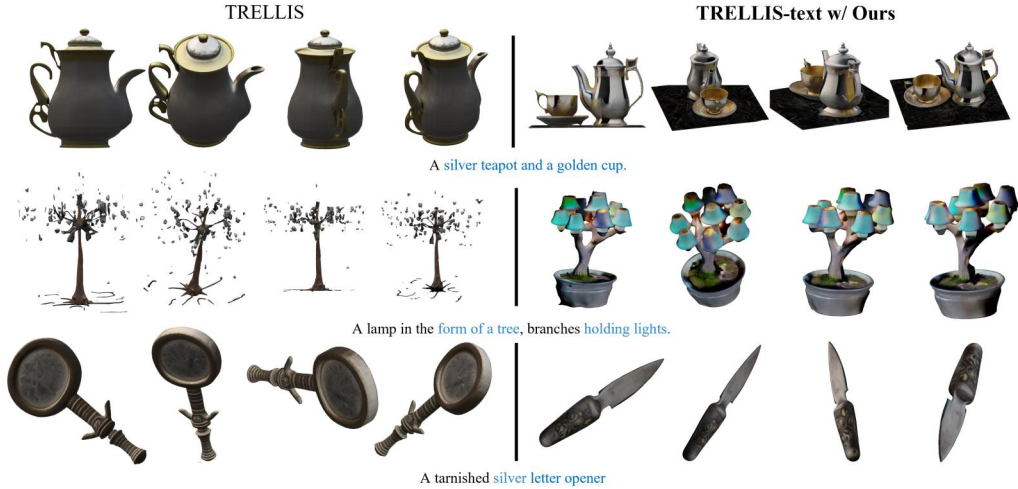

Figure 8. More qualitative comparisons with TRELLIS-text. Our method gain a better performance in more complex multi-target or fantastic object generation scenes, offering better semantic-aligned results, marked in blue.

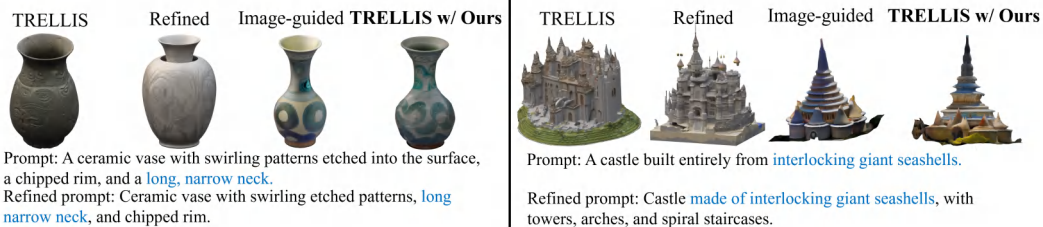

Figure 9. Comparison results of different generate conditions, Refined denotes the prompt is refined following the format of 3D-FUTURE. Image-guided denotes the results of TRELLIS-image conditioned on CFD intermediate images.

Table 5. Comparisons of different reference images for TRELLIS-image. w/ SD denotes we directly use the Stable Diffusion (SD) model to generate image for TRELLIS-image. A&E denotes the 2D debiased method Attend-and-Excite [1] for SD model of CFD. \* denotes only alter the words with the last 50% grad score.

| Method  | Prompts | Single Object |         |         |           | Multiple Object |        |         |             |
|---------|---------|---------------|---------|---------|-----------|-----------------|--------|---------|-------------|
|         |         | Basic         | Refined | Complex | Fantastic | Grouped         | Action | Spatial | Imaginative |
| w/ SD   | 0       | 7.43          | 7.34    | 6.48    | 6.27      | 5.77            | 5.31   | 6.36    | 5.73        |
| w/ CFD  | 0       | 7.67          | 7.42    | 6.52    | 6.33      | 5.81            | 5.34   | 6.40    | 6.07        |
| w/ A&E  | 0       | 7.52          | 7.46    | 6.51    | 6.34      | 5.82            | 5.32   | 6.37    | 6.09        |
| w/ A&E* | 0       | 7.62          | 7.51    | 6.55    | 6.37      | 5.84            | 5.38   | 6.43    | 6.11        |
| w/ CFD  | 1       | 7.82          | 7.57    | 6.54    | 6.51      | 5.93            | 5.38   | 6.47    | 6.14        |
| w/ A&E* | 1       | 7.94          | 7.66    | 6.57    | 6.59      | 5.93            | 5.42   | 6.43    | 6.14        |

## A. More Qualitative Results

We present more results for our method using TRELLIS-text in the Fig. 8. Although TRELLIS-text could produce multi-view consistent 3D meshes, its performance declines when processing long or complex prompts due to its biased perception of the prompt text semantics. Specifically, as shown in rows 1 and 2, TRELLIS-text overemphasizes the words “teapot” and “tree”, neglecting the overall semantics of the prompt. Our method refines the TRELLIS-text to

generate robust, semantically consistent 3D meshes across varying prompt lengths and complexities to construct more diverse results.

## B. Analysis of the Reference Images

As shown in the Table 5 and Fig. 9, we have the following findings: First, due to the limited training data, TRELLIS lacks some 3D semantic concepts. Thus directly constructing reference images using a 2D generation model or relying on a single intermediate reference image of CFD does not yield good generation results. Therefore, we fine-tuned TRELLIS by generating 3D meshes using the text-based 3D method CFD. Second, based on quantized word-level bias, we can combine existing 2D image debiasing methods to accurately enrich the semantics of reference images, thus promoting diverse 3D generation.

## References

- [1] Hila Chefer, Yuval Alaluf, Yael Vinker, Lior Wolf, and Daniel Cohen-Or. Attend-and-excite: Attention-based semantic guidance for text-to-image diffusion models. *ACM transactions on Graphics (TOG)*, 42(4):1–10, 2023. 2
